# Supplementary material for: Visible-light-driven photocatalytic CO2 reduction to formate over a zirconium-porphyrin metal–organic framework with shp-a topology
Source: Royal Society of Chemistry journal article supplement (doi:10.1039/d2nj03580d), 2022-01-01
Supplement: d2nj03580d1.pdf [file d2nj03580d1.pdf]

## Supporting Information

### **Visible-light-driven photocatalytic CO<sub>2</sub> reduction to formate over zirconium-porphyrin metal-organic framework with *shp-a* topology**

*Dashu Chen,<sup>a</sup> Zhifen Guo,<sup>b</sup> Bin Li<sup>\*a</sup> and Hongzhu Xing<sup>\*b</sup>*

*<sup>a</sup>College of Chemistry, Chemical Engineering and Resource Utilization; Post-doctoral Mobile Research Station of Forestry Engineering, Northeast Forestry University, No. 26 Hexing Road, Harbin 150040, China*

*<sup>b</sup>Provincial Key Laboratory of Advanced Energy Materials, College of Chemistry, Northeast Normal University, No. 5268 Renmin Street, Changchun, 130024, China*

E-mail: libinzh62@163.com (B. Li)

E-mail: xinghz223@nenu.edu.cn (H. Xing)

## Materials

CH<sub>3</sub>CN (99.9%, for HPLC, Acros), TEOA (99%, Acros), Zirconium (IV) chloride (ZrCl<sub>4</sub>) (99%, TCI), Zirconium propoxide solution (70 wt.% in *n*-propanol, Acros), acetic acid (99.5%, Innochem), methylacrylic acid (99.0%, Aladdin), tetrakis(4-carboxyphenyl)-porphyrin (TCPP, Jinan Henghua Sci. & Tec. Co., Ltd.), <sup>13</sup>CO<sub>2</sub> (99%, Wuhan newreid Special Gas Co., Ltd.). Other reagents were of analytical grade and used without further purification.

## Characterization

The powder X-ray diffraction (PXRD) patterns were recorded with a Rigaku D-MAX 2550 diffractometer using Cu-K $\alpha$  radiation ( $\lambda = 0.15417$  nm) with  $2\theta$  ranging from 3 to 40°. The morphologies of samples were characterized by a field emission scanning electron microscopy (XL30ESEM-FEG, USA). N<sub>2</sub> adsorption were measured by using Micromeritics ASAP 2020 instrument. UV-vis spectra of solid state samples were measured on a HITACHI U-4100 spectrophotometer. Mott-Schottky measurement was conducted using Pt and Ag/AgCl electrodes as the counter electrode and reference electrode, respectively. The working electrode was prepared on a fluorine-doped tin oxide (FTO) glass, and 0.2 M of Na<sub>2</sub>SO<sub>4</sub> solution was used as electrolyte. Photocurrent measurements were conducted on electrochemical workstation CHI 660E (ChenHua Instrument, Shanghai). The <sup>13</sup>C Nuclear Magnetic Resonance (NMR) spectra were recorded on a Bruker AVANCE III 600M system (600 MHz). The fluorescence emission was recorded on an LS-55 fluorescence spectrometer made by PerkinElmer. FT-IR were recorded on a Mattson Alpha-Centauri spectrometer within 400–4000 cm<sup>-1</sup> using the samples prepared as pellets with KBr. The formed formate was detected by using a Metrohm 940 Professional IC Vario. EPR spectra were obtained on a JES-FA 200 EPR spectrometer; scanning frequency: 9.45 GHz; scanning power: 0.998 mW; scanning temperature: 25 °C. The in situ EPR experiments were carried out using a 500 W xenon arc lamp where a 420 nm optical filter was used to cut off ultraviolet light. The stable radical of 2,2-diphenyl-1-picrylhydrazyl (DPPH) was used as a standard for the calculation of *g* values. In the molecular docking study part, the 3D structures of CO<sub>2</sub>, Zr clusters and TCPP ligand were first prepared through Discovery Studio (Biovia Inc. San Diego, CA, USA) by referring to the crystal structures of PCN-223. Docking modeling used the CDocker method in Discovery Studio. Combining CDocker Energy and CDocker Interaction Energy values, a reasonable docking conformation is selected.

### Synthesis of $Zr_6$ methacrylate oxoclusters $Zr_6(OH)_4O_4(OMe)_{12}(PrOH)$

2 mL of Zirconium(IV) propoxide (ca. 70%, solution in *n*-propanol, 4.95 mmol) was mixed under an  $N_2$  atmosphere with 2.5 mL of methacrylic acid and stored in a closed Schlenk tube at ambient temperature for 11 days. After washed with *n*-propanol, the resulted samples were dried at 60 °C.

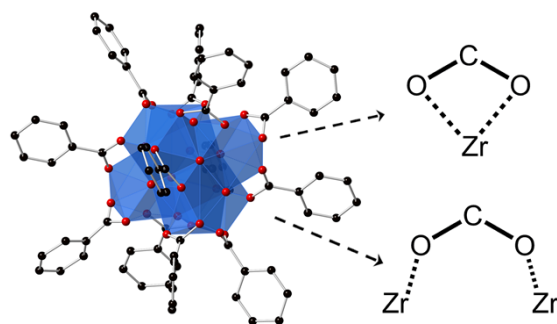

**Figure S1.** Two kinds of coordination modes for carboxyl group of TCPP ligand in PCN-223.

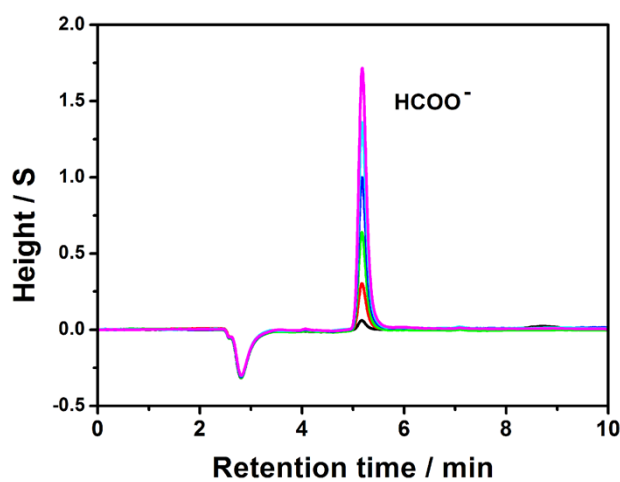

**Figure S2.** The ion chromatograms of  $HCOO^-$  standard solution.

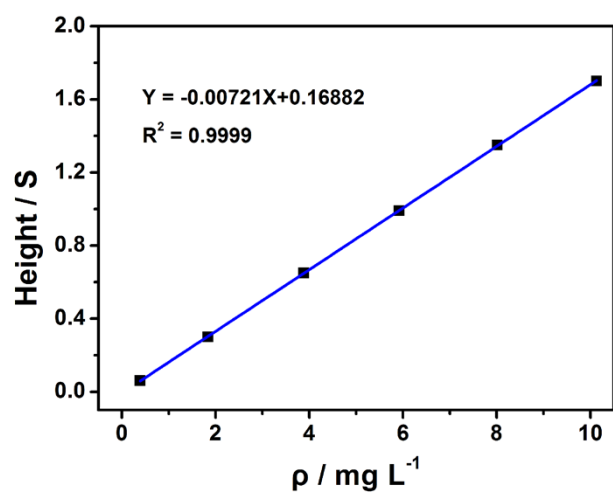

Figure S3. Calibration curve of  $\text{HCOO}^-$  solution.

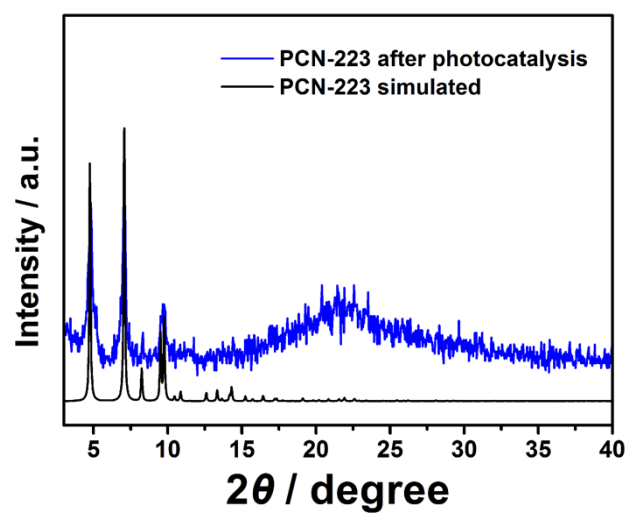

Figure S4. PXRD patterns of PCN-223 after 10 h photocatalytic reaction and the simulated PCN-223.

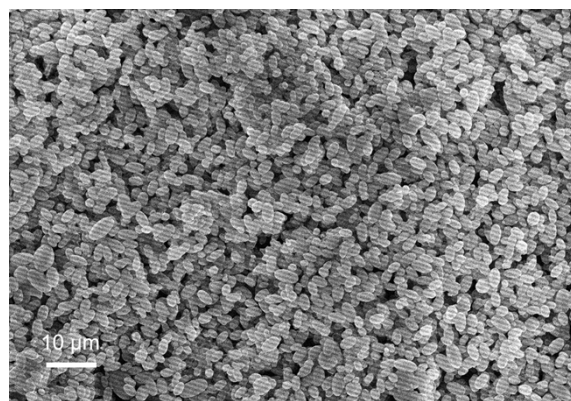

**Figure S5.** SEM image of PCN-223 after 10 h photocatalytic reaction.

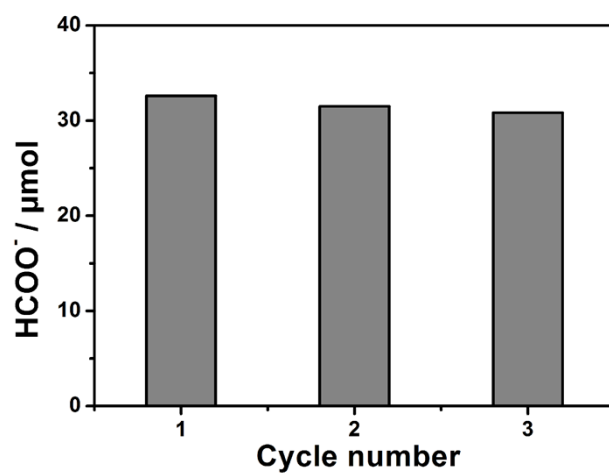

**Figure S6.** The cyclic tests of PCN-223 for photocatalytic CO<sub>2</sub> reduction under 10 h visible light irradiation.

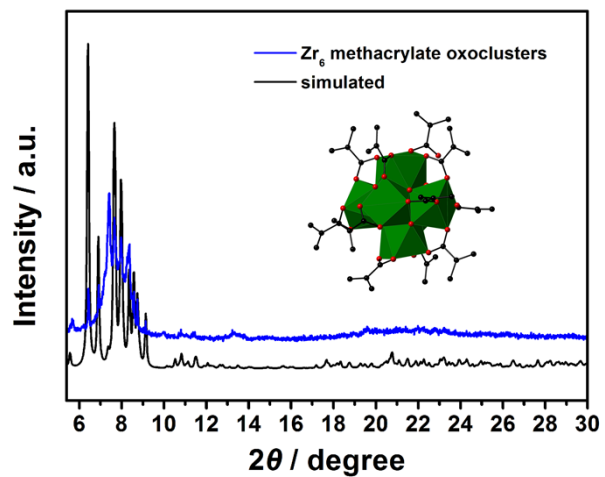

**Figure S7.** PXRD patterns of Zr<sub>6</sub> methacrylate oxoclusters and the simulated one.

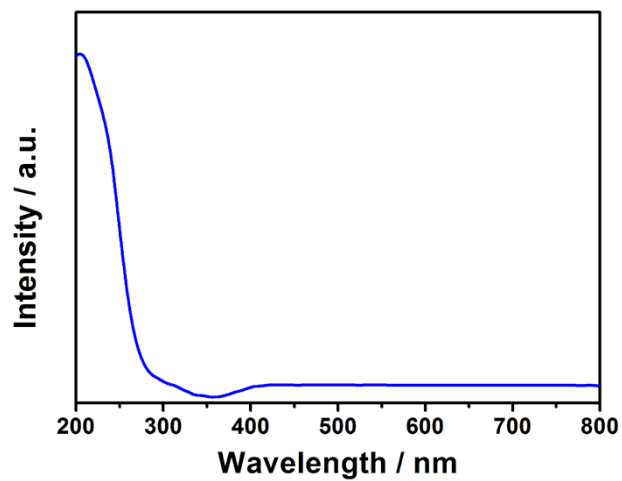

**Figure S8.** Solid UV-Vis absorption spectra of Zr<sub>6</sub> methacrylate oxoclusters.

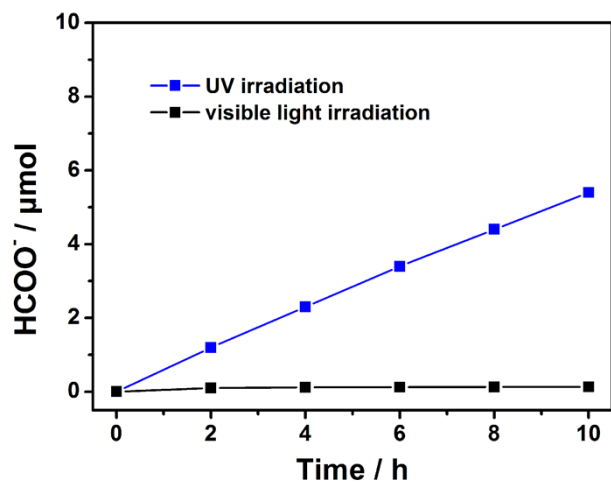

**Figure S9.** Amounts of HCOO<sup>-</sup> produced by Zr<sub>6</sub> methacrylate oxoclusters as a function of visible-light irradiation time {the solution were irradiated by a 300 W Xe lamp with a 420 nm cut-off filter (black) or six 10 W LED lamp (260-280 nm, blue)}.

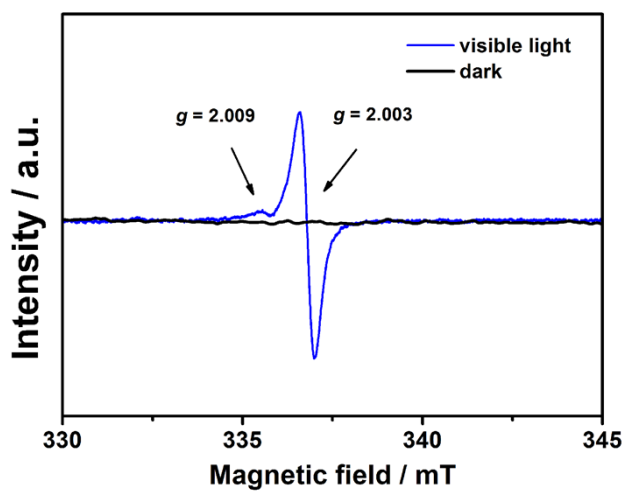

**Figure S10.** EPR spectra with *g* values for PCN-223.

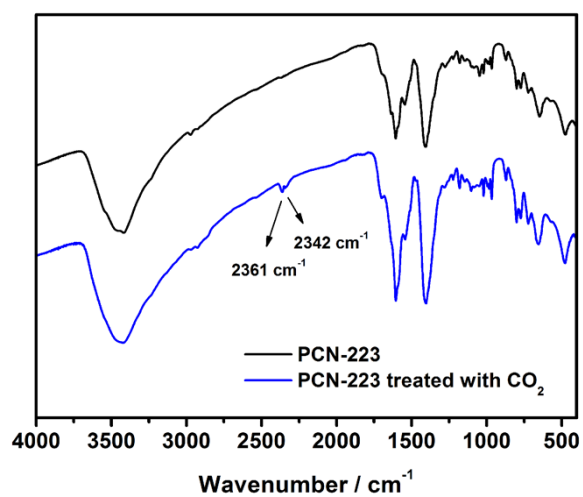

**Figure S11.** IR spectra of PCN-223 under different conditions.

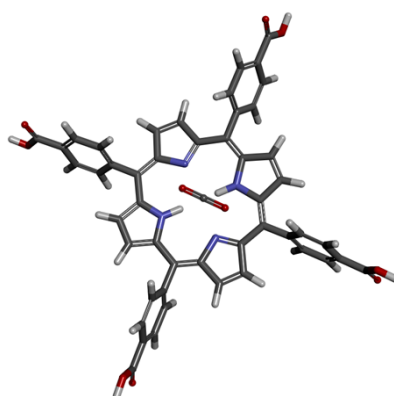

**Figure S12.** The optimal molecular docking conformation of CO<sub>2</sub> and TCPP ligand (cdocker energy = -3.72 kcal·mol<sup>-1</sup>, cdocker interaction energy = 3.72 kcal·mol<sup>-1</sup>).
